# Supplementary material for: Boron–pnictogen monolayers with a negative Poisson's ratio and excellent band edge positions for photocatalytic water splitting
Source: Royal Society of Chemistry journal article supplement (doi:10.1039/d3cp00413a), 2023-01-01
Supplement: d3cp00413a1.pdf [file d3cp00413a1.pdf]

**Electronic Supplementary information for**  
**Boron-Pnictogen Monolayers with Negative Poisson's ratio**  
**and Excellent Band Edge Positions for Photocatalytic Water**  
**Splitting.**

Naga Venkateswara Rao Nulakani and T. J. Dhilip Kumar\*

Quantum Dynamics Lab, Department of Chemistry, Indian Institute of Technology  
Ropar, Rupnagar 140001, India.

\*Corresponding Author:

[dhilip@iitrpr.ac.in](mailto:dhilip@iitrpr.ac.in)

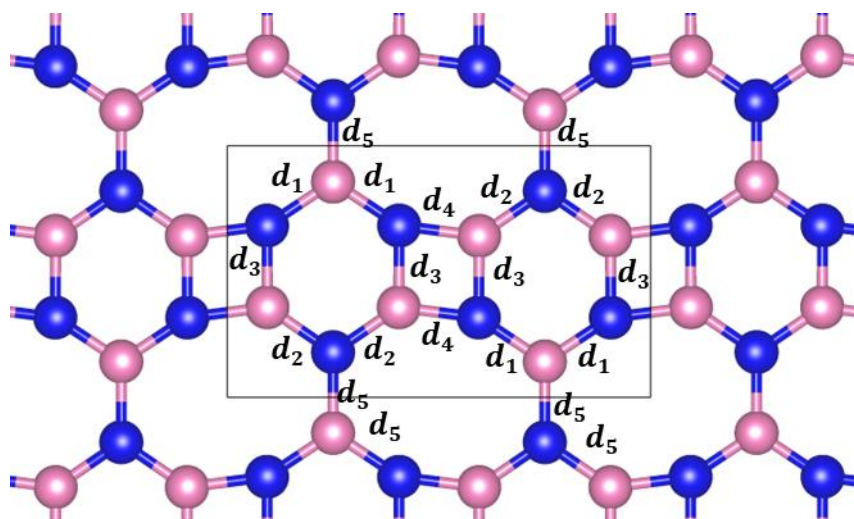

**Figure S1.** Atomic bond lengths of bp-BX nanosheets. The pink spheres represent the boron and the blue spheres represent the pnictogen ( $X = \text{N}, \text{P}, \text{As}$  and  $\text{Sb}$ ) atom.

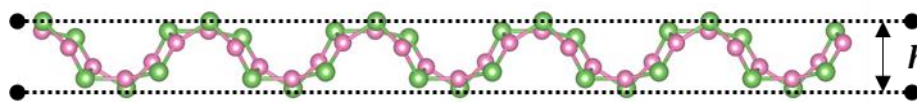

**Figure S2.** Out-of-plane buckling height ( $h$ ) of bp-BX nanosheets, ( $X = \text{P}, \text{As}, \text{Sb}$ ).

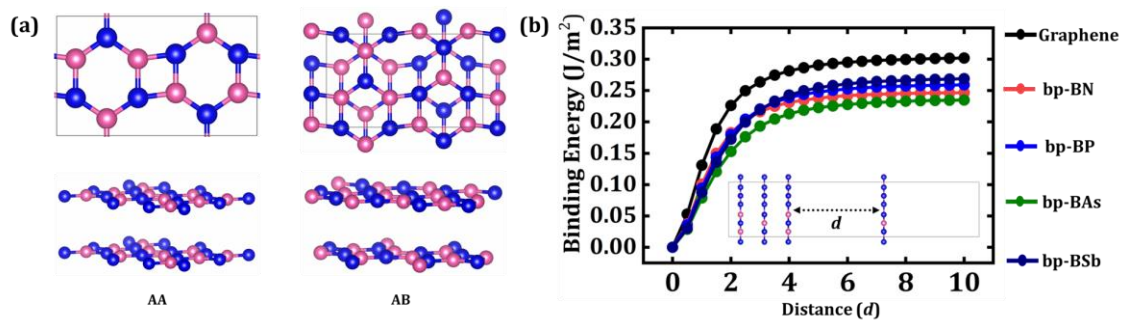

**Figure S3.** (a) AA and AB-type stacking of bp-BX ( $X = \text{N}, \text{P}, \text{As}, \text{Sb}$ ) 3D phases and (b) computed interlayer binding energy of bp-BX ( $X = \text{N}, \text{P}, \text{As}, \text{Sb}$ ) nanosheets and graphene.

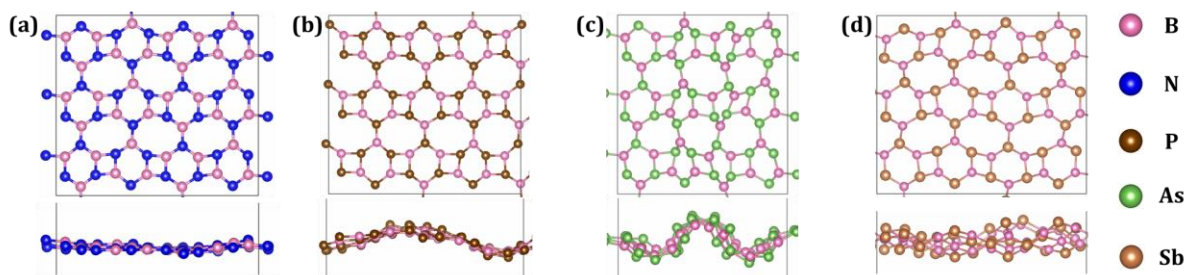

**Figure S4.** Snapshots of simulated structures of the bp-BX monolayers at the end of 10 picoseconds AIMD simulation.

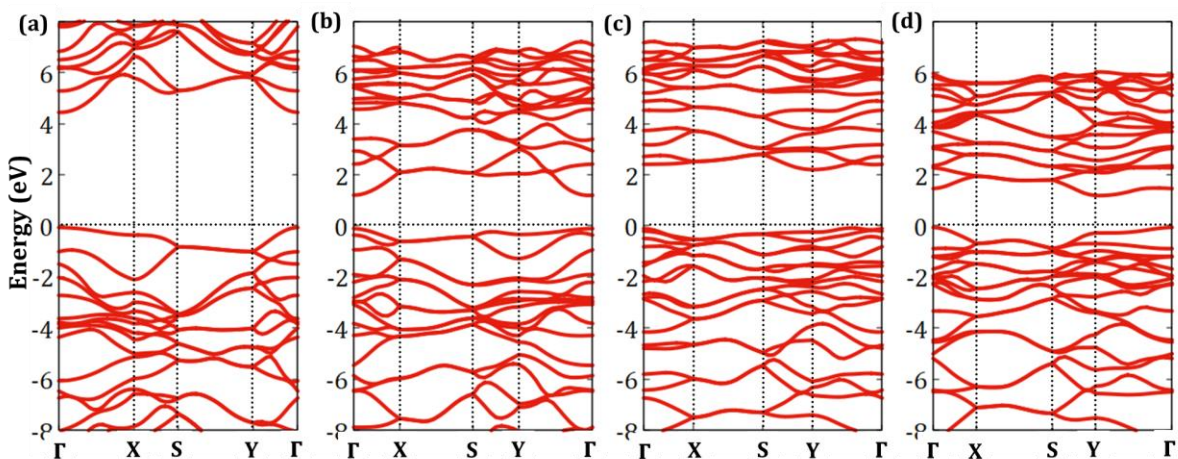

**Figure S5.** Calculated electronic band structures of bp-BX ( $X = N, P, As, Sb$ ) nanosheets calculated at HSE06 level of theory. (a) bp-BN, (b) bp-BP, (c) bp-BAs and (d) bp-BSb. The Fermi level is set to zero eV in all cases.

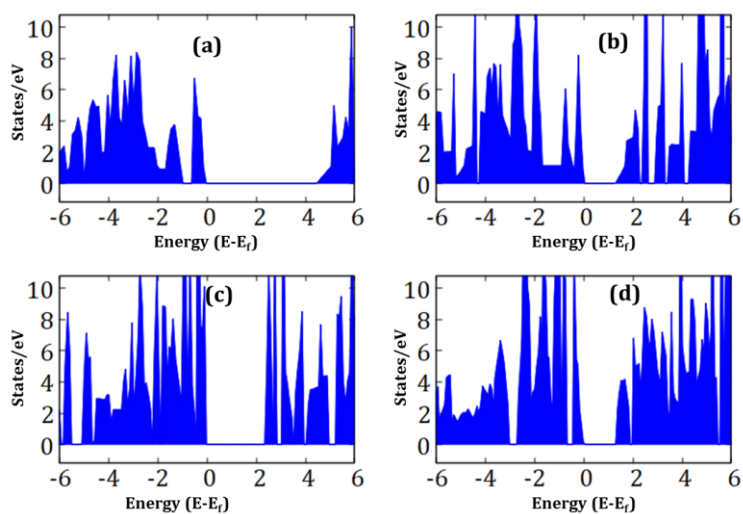

**Figure S6.** Calculated electronic density of states of bp-BX ( $X = N, P, As, Sb$ ) nanosheets calculated at HSE06 level of theory. (a) bp-BN, (b) bp-BP, (c) bp-BAs and (d) bp-BSb.

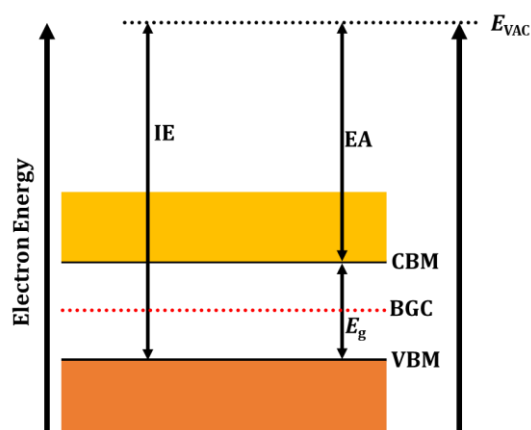

**Figure S7.** Electronic energy diagram of a semiconductor with energy gap  $E_g$ , band edges (CBM and VBM), bandgap centre (BGC), vacuum level ( $E_{VAC}$ ), ionization energy (IE) and electron affinity (EA).

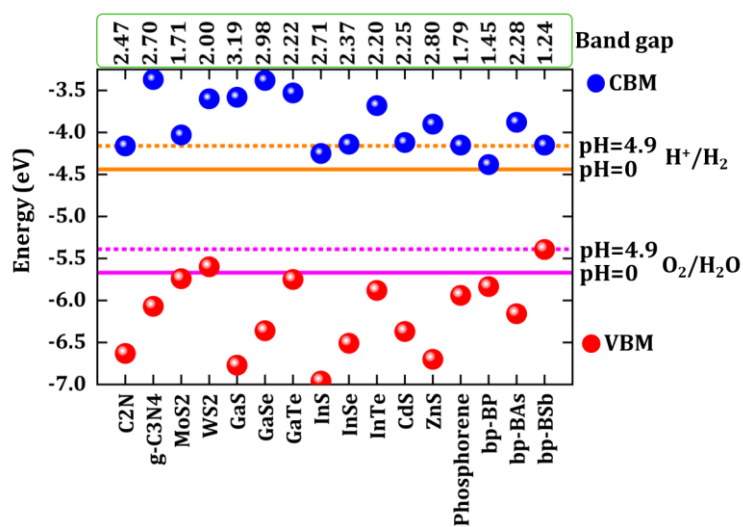

**Figure S8.** Absolute positions of VBM, CBM, energy gap of different 2D photocatalysts for hydrogen production from water.
